# Supplementary material for: Chronocoulometric signalling of BNP using a novel quantum dot aptasensor
Source: Royal Society of Chemistry journal article supplement (doi:10.1039/d2an01357f), 2022-01-01
Supplement: d2an01357f1.pdf [file d2an01357f1.pdf]

## **Chronocoulometric Signalling of BNP using a Novel Quantum Dot Aptasensor**

Marlon Oranzie<sup>a,b</sup>, Samantha F. Douman<sup>\*b</sup>, Onyinyechi V. Uhuo<sup>a</sup>, Kefilwe V. Mokwebo<sup>a</sup>, Nelia Sanga<sup>a</sup>, Emmanuel I. Iwuoha<sup>\*a</sup>

<sup>a</sup> SensorLab (University of the Western Cape Sensor Laboratories), Chemical Sciences Building, University of the Western Cape, Bellville 7535, Cape Town, South Africa.

<sup>b</sup> Department of Chemistry, University of Cape Town, Rondebosch, Cape Town, 7700, South Africa

**Corresponding Authors:** [eiwuoha@uwc.ac.za](mailto:eiwuoha@uwc.ac.za); [samantha.douman@uct.ac.za](mailto:samantha.douman@uct.ac.za)

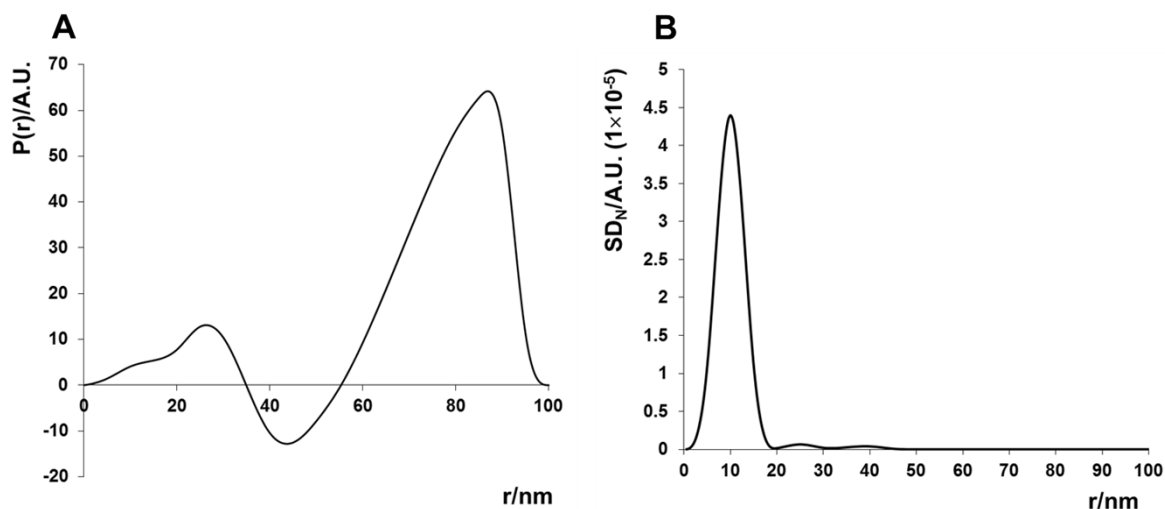

**Fig. S1** PDDF (A) and  $SD_N$  (DB) models for MSA-NiSe<sub>2</sub> QDs in aqueous solution (QDs produced using a reaction time of 15 min).

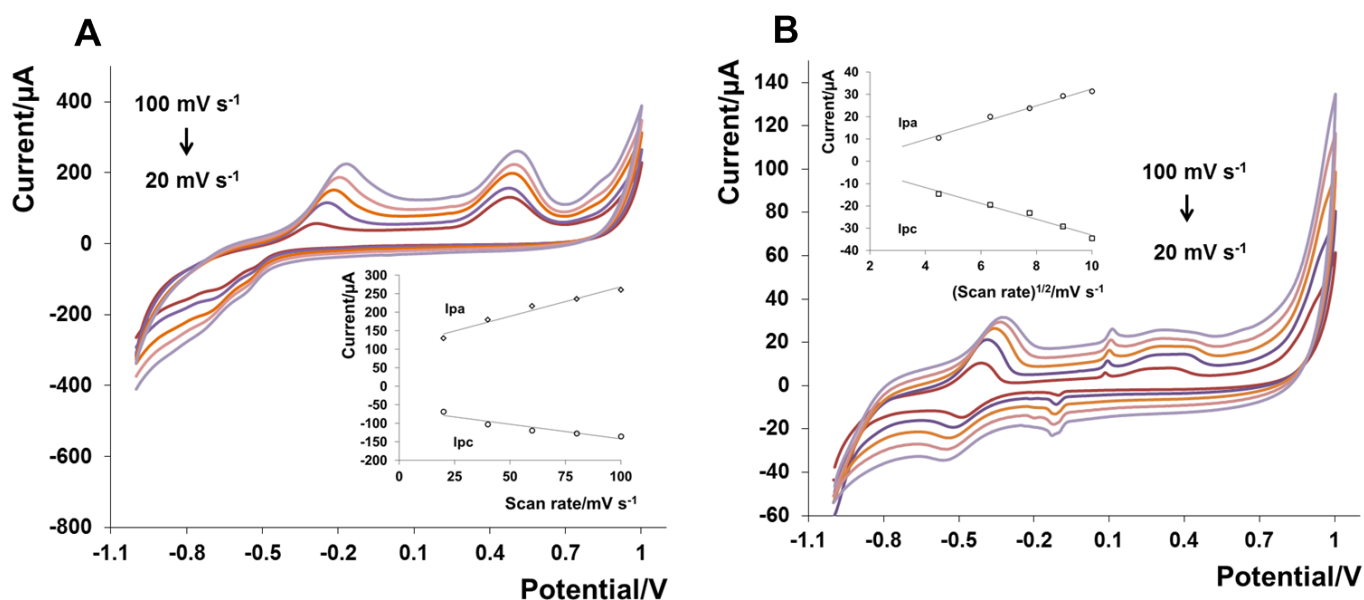

**Fig. S2:** Cyclic Voltammograms of pre-adsorbed MSA-NiSe<sub>2</sub> QDs on SPCE (A) and solution MSA-NiSe<sub>2</sub> QDs at SPCE (B), in 10 mM PBS, pH 7.4, at multiple scan rates ranging from 20 to 100 mV s<sup>-1</sup>.

**Table S1:** Comparison of nano-based electrochemical biosensors for BNP detection.

| Method                          | Interface                              | Linear range                                                  | LOD                      | Reference        |
|---------------------------------|----------------------------------------|---------------------------------------------------------------|--------------------------|------------------|
| EIS                             | Nanostructured ZnO/Au microelectrode   | 0.001-1000 ng mL <sup>-1</sup>                                | 8 pg mL <sup>-1</sup>    | 1                |
| DPV                             | Anti-BNP-Streptavidin modified SPCE    | 1.0x10 <sup>-2</sup> -1.0x10 <sup>2</sup> ng mL <sup>-1</sup> | 3.3 ng mL <sup>-1</sup>  | 2                |
| Linear sweep voltammetry (LSV)  | AChE-labeled anti-BNP antibodies       | 200 -1000 ng mL <sup>-1</sup>                                 | 10 ng mL <sup>-1</sup>   | 3                |
| Lateral flow immunoassay (LFIA) | AuNPs modified LFIA                    | -                                                             | 0.1 ng mL <sup>-1</sup>  | 4                |
| Amperometric                    | Anti NT-proBNP-HRP-SPCE                | 0.57-193 ng mL <sup>-1</sup>                                  | 0.43 ng mL <sup>-1</sup> | 5                |
| Chronocoulometry                | aptamer/MSA-NiSe <sub>2</sub> QDs/SPCE | 10 -180 pgmL <sup>-1</sup>                                    | 5.45 pgmL <sup>-1</sup>  | <b>This work</b> |

## References:

- 1 N. R. Shanmugam, S. Muthukumar, A. S. Tanak and S. Prasad, *Future Cardiol.*, 2018, **14**, 131–141.
- 2 Y. W. Hartati, M. H. Daniswara, R. Nurmalasari, S. Gaffar and T. Subroto, *Molekul*, 2018, **13**, 1.
- 3 H. Matsuura, Y. Sato, O. Niwa and F. Mizutani, 2005, **77**, 4235–4240.
- 4 Y. Gong, J. Hu, J. R. Choi, M. You, Y. Zheng, B. Xu, T. Wen and F. Xu, *Int. J. Nanomedicine*, 2017, **12**, 4455–4466.
- 5 B. E. F. de Ávila, V. Escamilla-Gómez, V. Lanzone, S. Campuzano, M. Pedrero, D. Compagnone and J. M. Pingarrón, *Electroanalysis*, 2014, **26**, 254–261.
